1 **Modelling invasive pathogen load from non-destructive sampling data**

2

3 Natália Martínková<sup>a,b\*</sup>, Pavel Škrabánek<sup>c</sup>, Jiri Pikula<sup>d</sup>

4

5 <sup>a</sup> Institute of Vertebrate Biology, Czech Academy of Sciences, Květná 8, 603 65 Brno,

6 Czech Republic; email: martinkova@ivb.cz.

7 <sup>b</sup> Institute of Biostatistics and Analyses, Masaryk University, Kamenice 3, 625 00

8 Brno, Czech Republic.

9 <sup>c</sup> Institute of Automation and Computer Science, Faculty of Mechanical Engineering,

10 Brno University of Technology, Technická 2896/2, 616 69 Brno, Czech Republic;

11 email: pavel.skrabaneck@vut.cz.

12 <sup>d</sup> Department of Ecology and Diseases of Game, Fish and Bees, University of

13 Veterinary and Pharmaceutical Sciences Brno, Palackého třída 1946/1, 612 42 Brno,

14 Czech Republic; email: pikulaj@vfu.cz.

15

16 \*Corresponding author: martinkova@ivb.cz

17

18

19

20 **Abstract**

21 Where microbes colonizing skin surface may help maintain organism homeostasis,  
22 those that invade living skin layers cause disease. In bats, white-nose syndrome is a  
23 fungal skin infection that affects animals during hibernation and may lead to mortality  
24 in severe cases. Here, we inferred the amount of fungus that had invaded skin tissue  
25 of diseased animals. We used simulations to estimate the unobserved disease severity  
26 in a non-lethal wing punch biopsy and to relate the simulated pathology to the  
27 measured fungal load in paired biopsies. We found that a single white-nose syndrome  
28 skin lesion packed with spores and hyphae of the causative agent, *Pseudogymnoascus*  
29 *destructans*, contains 48.93 pg of the pathogen DNA, which amounts to about 1560 *P.*  
30 *destructans* genomes in one skin lesion. Relating the information to the known UV  
31 fluorescence in Nearctic and Palearctic bats shows that Nearctic bats carry about 1.7  
32  $\mu\text{g}$  of fungal DNA per  $\text{cm}^2$ , whereas Palearctic bats have  $0.04 \mu\text{g cm}^{-2}$  of *P.*  
33 *destructans* DNA. With the information on the fungal load that had invaded the host  
34 skin, the researchers can now calculate disease severity as a function of invasive  
35 fungal growth using non-destructive UV light transillumination of each bat's wing  
36 membranes. Our results will enable and promote thorough disease severity assessment  
37 in protected bat species without the need for extensive animal and laboratory labor  
38 sacrifices.

39

40 **Keywords:** pathogen load; skin lesion; fungal infection; *Pseudogymnoascus*

41 *destructans*; white-nose syndrome; bat; UV light diagnostics

42

43

## 44 **1. Introduction**

45 Association of pathogen load with infections transmission stands at the forefront of  
46 epidemiological dynamics models, where high pathogen load increases chances of  
47 transmission (Wilson et al., 2008). The amount of the pathogen that can infect a new  
48 host represents an infectious dose. In natural condition, the infectious dose needs to be  
49 transmitted through pathogen shedding via aerosol, direct or vector-mediated oral or  
50 bodily fluids exchange. As such, the pathogen is often quantified in sputum, feces,  
51 urine or blood, but such measures do not directly reflect the systemic infection or  
52 disease severity.

53 Clinical data support that the overall pathogen load positively correlates with disease  
54 severity (Franz et al., 2010; van der Poll and Opal, 2008). Technical and ethical  
55 hurdles hinder estimation of the overall load of the pathogen, where the pathogen may  
56 occur in different tissues in differing quantities during disease progression  
57 (Cunnington, 2015). Thorough sampling can then be possible during autopsy with  
58 pathogen quantification in multiple tissue samples, which is sadly late for the patient.  
59 Research in infectious diseases aims to prevent lethal outcomes and non-lethal  
60 methods must be preferred.

61 In case of white-nose syndrome (WNS), a fungal infection caused by  
62 *Pseudogymnoascus destructans* in hibernating bats (Blehert et al., 2009; Lorch et al.,  
63 2011), the disease severity can be estimated from histopathologic examination of  
64 wing membrane tissue (Meteyer et al., 2009; Pikula et al., 2017; Reeder et al., 2012).  
65 Following skin surface colonization, *P. destructans* invades the skin and forms  
66 cupping erosions diagnostic of WNS (Pikula et al., 2017). A cupping erosion is a cup-  
67 shaped skin lesion densely packed with fungal hyphae (Meteyer et al., 2009) and the  
68 fungus in the cupping erosions produces secondary metabolites that further damage

69 skin of the host (Flieger et al., 2016). Early methodology designed to assess disease  
70 severity was lethal, as it required excision and rolling an interdigital segment of the  
71 wing in preparation for serial cross-sections used in stained microscopy slides.  
72 Number and distribution of the skin lesions were then used to score the severity of the  
73 disease (Reeder et al., 2012). More recent methodology utilizes punch biopsy  
74 sampling guided by characteristic fluorescence of skin lesions in ultraviolet (UV)  
75 light, enabling the bat to survive the examination (Pikula et al., 2017).  
76 Progress from lethal to destructive sampling facilitated examination of bats with  
77 higher conservation status for WNS. To further reduce handling and disturbance of  
78 bats for research purposes, herein we estimated the fungal load that invaded host  
79 tissues in WNS skin lesions. Our approach combines previously published data on  
80 fungal load estimated as the amount of *P. destructans* DNA on the wing punch where  
81 the wing was without a WNS lesion and fungal load in a wing punch where UV  
82 transillumination revealed characteristic fluorescence indicative of WNS lesions. The  
83 relationship between the fungal loads measured from the paired biopsies can be used  
84 to estimate how much fungal DNA there is in the bat wing tissue, because *P.*  
85 *destructans* fluoresces under UV light after it had formed skin lesions. As the invasive  
86 infection progresses, multiple lesions develop and the fungal load in the skin tissue  
87 exceeds the fungal load on the wing surface (Martínková et al., 2018). Sampling in  
88 the field cannot distinguish between a single microscopic lesion and multiple  
89 confluent lesions as both cases manifest as a fluorescing dot when handling a live bat  
90 in a cave (Fig. 1). In the laboratory, quantifying pathogen DNA requires enzymatic  
91 tissue digestion, meaning that estimating infection intensity with DNA-based methods  
92 as well as disease severity with histological microscopy is not possible from the same  
93 sample. We therefore simulate possible histopathologic findings in the wing punch

94 digested for pathogen DNA quantification to infer how much *P. destructans* there is  
95 in a single WNS skin lesion. We further calculate how the invasive fungal DNA  
96 quantity relates to the biology of the infection, and we estimate the number of nuclei  
97 in the invading fungal hyphae. We use these results to compare the invasive infection  
98 in the Palearctic and Nearctic bats.

99

## 100 **2. Materials and Methods**

101 We used previously published data on fungal load present in a wing punch biopsy  
102 (Fig. 1a in Flieger et al., 2016). The data comes from paired wing punch samples from  
103 the same bat, where one punch was taken over a membrane segment with an orange  
104 yellow fluorescence spot indicating a lesion (Turner et al., 2014) and the other punch  
105 from an area where no UV florescent lesions were apparent (Fig. 1). In total, 41  
106 *Myotis myotis* bats with paired wing biopsies were sampled and fungal load as a  
107 measure of fungal DNA was quantified with quantitative polymerase chain reaction  
108 (Flieger et al., 2016), i.e. sample size  $n = 41$ .

109 The dependence of the total fungal load on wing membrane that contains a UV  
110 fluorescent lesion diagnostic for WNS *Pd* on the fungal load representing surface  
111 colonization on an infected wing membrane  $\widetilde{Pd}$  is linear in logarithmic scale (Flieger  
112 et al., 2016). The total fungal load in a biopsy with a lesion *Pd* is compounded from  
113 the surface skin colonization  $\widetilde{Pd}$  and the invasive fungal growth, where the invasive  
114 fungal growth is proportional to the number of skin lesions present in the sample.

115 The dependence of  $\log_{10}(Pd)$  on  $\log_{10}(\widetilde{Pd})$  can be used to quantify fungal load in a  
116 WNS lesion. Once translated to the quadrant IV of the Cartesian system, the intercept  
117 of the linear model  $\alpha_0$  represents the fungal load in the single lesion  $\widetilde{Pd}^1$ . The  
118 modified relationship is given as

$$\log_{10}(Pd) = \alpha_0 + \alpha_1(\log_{10}(\widetilde{Pd}) + c), \quad \text{Eq. 1}$$

119 where the constant for translating the data values  $c = -\min \log_{10}(\widetilde{Pd})$ . The  
120 unknown model parameters  $\alpha_0$  and  $\alpha_1$  can be estimated using a least square method  
121 from the set of observations.

122 Following Eq. 1, the fungal load in a single WNS lesion is  $\widetilde{Pd}^1 = 10^{\alpha_0}$  for  $\alpha_1 \approx 1$ .  
123 Knowing the fungal load in a single WNS lesion and having enumerated the number  
124 of WNS lesions on a wing membrane from their UV fluorescence  $n_{UV}$ , we can  
125 calculate the tissue invasive fungal load  $\widetilde{Pd}$  as

$$\widetilde{Pd} = n_{UV} \cdot \widetilde{Pd}^1. \quad \text{Eq. 2}$$

126 In the empirical study (Flieger et al., 2016), the slope of the regression  $\alpha_1 = 0.294$ ,  
127 meaning that difference in fungal load between a biopsy negative and positive for UV  
128 fluorescence is due to additional factors than simple presence of a single WNS lesion  
129 in one biopsy. To investigate why there is a departure from 1, we departed the  
130 covariates confounding total fungal load of the  $i$ -th single wing membrane biopsy  
131 containing a UV fluorescent lesion  $Pd_i$ . First, the surface of a WNS lesion influences  
132 the area, where the fungus colonizes bat wing surface. Second, a UV fluorescent spot  
133 observed without magnification in the field might represent a more complex  
134 histopathology detectable with microscopy.

135

### 136 ***2.1. Influence of wing surface area of a WNS lesion***

137 The first confounding aspect we considered influences intercept  $\alpha_0$ . The surface  
138 colonization affects a smaller area in a biopsy with a lesion as the wing surface area of  
139 the lesion cannot be considered to contain surface colonization by *P. destructans*. The  
140 total fungal load in the  $i$ -th wing biopsy is

$$Pd_i = \widetilde{Pd}_i^* + \widetilde{Pd}_i, \quad \text{Eq. 3}$$

141 where  $\widetilde{Pd}_i$  represents fungal load in the UV fluorescent lesion for the  $i$ -th biopsy, and  
142 for this biopsy,  $\widetilde{Pd}_i^*$  represents a surface colonization satisfying the condition of a  
143 sampled area  $A$ . It holds that

$$A(\widetilde{Pd}_i^*) = A(\widetilde{Pd}_i) \not\subset A(Pd_i), \quad \forall i \in I, \quad \text{Eq. 4}$$

144 where  $I$  is a set of sample indices and  $I = \{1, \dots, n\}$ .

145 In the sampling regime used to derive the original model (Flieger et al., 2016), the  
146 wing membranes were biopsied with standard 4 mm punch needles. The fungal DNA  
147 was thus quantified from the whole wing biopsy with radius  $R$ , meaning that the  
148 surface colonization covers both sides of the biopsy. At least one cupping erosion  
149 with radius  $r$  was present in the biopsy, and 46 % of *M. myotis* biopsies contained  
150 multiple cupping erosions (Pikula et al., 2017), i.e. the area covered by a surface  
151 colonization in the  $i$ -th biopsy is given as

$$A(\widetilde{Pd}_i^*) = 2\pi R_i^2 - \pi r_i^2 - 0.46 \pi r_i^2. \quad \text{Eq. 5}$$

152 In the empirical studies, the diameter of the  $i$ -th wing punch biopsy was  $2R_i = 4$  mm  
153 (Flieger et al., 2016) and mean cupping erosion was  $2r_i = 86 \mu\text{m}$  (Zukal et al., 2016)  
154 for  $\forall i \in I$ . Solving Eq. 5 numerically shows that  $A(Pd_i) - A(\widetilde{Pd}_i) > 0.99 A(Pd_i)$   
155 for  $\forall i \in I$ . The effect of presence of the cupping erosion area on the estimation of the  
156 fungal load in a WNS lesion is thus negligible.

157

## 158 **2.2 Influence of unobserved histopathology**

159 The second aspect affects the regression slope  $\alpha_1$ . The UV fluorescent lesion  
160 recognized without magnification during field sampling could represent a confluent  
161 series of cupping erosions (Fig. 1), increasing the relative invasive growth. The fungal  
162 load of wing biopsies with UV fluorescence should be revised according to

$$Pd' = Pd - \lambda u, \quad \text{Eq. 6}$$

163 where  $Pd'$  is the revised fungal load in a wing biopsy with UV fluorescence,  $Pd$  is the  
164 total fungal load estimated from the biopsy,  $u$  is number of additional cupping  
165 erosions, and  $\lambda$  is a theoretical fungal load in the UV fluorescent lesion where  
166  $\lambda \in [0.1, 10^{\alpha_0}]$  for  $\alpha_0 = -1.01527$ . The value for  $\alpha_0$  was inferred from the least  
167 squares regression as per Eq. 1 from the original data, where each biopsy with a UV  
168 fluorescence was assumed to contain a single WNS lesion. Note that the published  
169  $\alpha_0 = 0.015$  (Flieger et al., 2016) cannot be used directly, because the original data  
170 were not translated following their logarithmic transformation. The published data  
171 values are located in the quadrant III of the Cartesian system, where the intercept of  
172 the regression does not correspond to the fungal load in a single WNS lesion.  
173 In our experience, up to four additional cupping erosions can be associated with one  
174 biopsy, i.e.  $u \in \{0,1,2,3,4\}$  (Fig. 1). Each biopsy in a set of  $n$  biopsies is associated  
175 with one  $u$  forming a set of alternative histopathologic findings  $U$  of  $n$  elements  $u$ .  
176 According to the results (Pikula et al., 2017), probability of multiple UV fluorescent  
177 lesions in the set of biopsies is  $p(u|u > 0) = 0.46$ , i.e.  $p(u|u = 0) = 0.54$ . The  
178 probability of observing  $n_{UV+}$  additional cupping erosions in biopsies with multiple  
179 UV fluorescent lesions is given as  $p(n_{UV+}) = 0.5 - 0.1n_{UV+}$ , where  $n_{UV+} \in N_{UV+}$ ,  
180 and  $N_{UV+} = \{1,2,3,4\}$ . It means that  $p(u|u > 0) = 0.46(0.5 - 0.1u)$  for  $u \in N_{UV+}$ .  
181 Given the uncertainty in theoretical fungal load in a UV fluorescent lesion  $\lambda$ , there is  
182 an infinite number of possible revised fungal loads (Eq. 6) for the available empirical  
183 data. We approached the problem using simulations to estimate the effect of multiple  
184 UV fluorescent lesions in the biopsy on the regression slope  $\alpha_1$  for sampled  
185 combinations of  $\lambda$  and  $u$ . For that purpose, we created a vector  $\lambda$  with  $n_\lambda$  evenly  
186 distributed  $\lambda$  where  $\lambda \in [0.1, 10^{\alpha_0}]$ , and we included the estimations of the total



187 fungal loads  $Pd$  for all  $n$  biopsies with a UV fluorescent lesion into a vector  $\mathbf{Pd}$ .  
 188 Further, we generated randomly  $n_u$  permutations of the set  $U$  for each  $\lambda \in \boldsymbol{\lambda}$ . The  $j$ -th  
 189 permutation of  $U$  for the  $k$ -th  $\lambda$  is given as  $\mathbf{u}_{j,k} = \rho_{j,k}(U)$  where  $\rho_{j,k}$  is the  $j$ -th  
 190 mapping for the  $k$ -th  $\lambda$ . In total,  $n_u \cdot n_\lambda$  random vectors  $\mathbf{u}$  are generated, where the  
 191 length of the vector  $\mathbf{u}_{j,k}$  is  $n$  for  $\forall j \in \{1, \dots, n_u\}$  and  $\forall k \in \{1, \dots, n_\lambda\}$ . For the  $k$ -th  $\lambda$  and  
 192 the  $j$ -th permutation, the revised fungal loads in wing biopsies are given as

$$\mathbf{Pd}'_{j,k} = \mathbf{Pd} - \lambda_k \mathbf{u}_{j,k}. \quad \text{Eq. 7}$$

193 We used the obtained revised fungal loads  $Pd'$  (Eq. 7) instead of the measured total  
 194 fungal loads  $Pd$  while estimating the coefficients  $\alpha_0$  and  $\alpha_1$  of the model Eq. 1  
 195 (Fig. 2). Using the least squares estimator,  $n_u \cdot n_\lambda$  coefficient estimations,  $\hat{\alpha}_0$  and  $\hat{\alpha}_1$ ,  
 196 were obtained for the  $n_u \cdot n_\lambda$  revised datasets. For each  $\lambda \in \boldsymbol{\lambda}$ , we searched for  
 197 coefficient estimations  $\hat{\alpha}_0$  and  $\hat{\alpha}_1$  that best match the expected dependence, i.e. we  
 198 searched for such setting where  $\hat{\alpha}_1 \approx 1$ . Considering this, we proposed an objective  
 199 function

$$J = |1 - \hat{\alpha}_1^{j,k}|, \quad \text{Eq. 8}$$

200 where  $\hat{\alpha}_1^{j,k}$  is the estimation of the coefficient  $\alpha_1$  for  $\lambda_k$  and the  $j$ -th permutation  $\mathbf{u}_{j,k}$ .  
 201 For  $\lambda_k \in \boldsymbol{\lambda}$ , the best setting is given as

$$\hat{\alpha}_0^k, \hat{\alpha}_1^k = \arg \min_{j=1, \dots, n_u} |1 - \hat{\alpha}_1^{j,k}|, \quad \text{Eq. 9}$$

202 where  $\hat{\alpha}_0^k$  and  $\hat{\alpha}_1^k$  are the best estimates of the coefficients  $\alpha_0$  and  $\alpha_1$  for  $\lambda_k$ . Note that  
 203  $n_u$  coefficient estimations were obtained for each  $\lambda \in \boldsymbol{\lambda}$ , and we calculated fungal  
 204 load in a WNS lesion as  $\widetilde{Pd}_k = 10^{\hat{\alpha}_0^k}$ .  
 205 The study assumes that the first biopsy from the pair represents a wing segment  
 206 without a WNS lesion, in which *P. destructans* colonized wing surface, and the  
 207 second biopsy from the pair contains a wing segment with a WNS lesion, where the

208 fungus invaded the tissue. Theoretically, the difference in fungal loads between the  
209 two biopsies should be greater than or equal to the fungal load in the WNS lesion.  
210 Sampled data that do not conform to the condition are likely influenced by sampling  
211 or laboratory artifacts or by as yet unrecognized natural phenomena. To test for the  
212 effect of possible unknown bias, we ran a set of simulations on the original and the  
213 reduced data. In the case of the reduced data, we used  $\forall k \in \{1, \dots, n_\lambda\}$  those paired  
214 biopsies where  $Pd - \widetilde{Pd} > \lambda_k$ .  
215 The equation Eq. 7 allows negative values of revised fungal load in a wing biopsy  
216 with a UV fluorescent lesion for some combinations of  $\lambda_k$  and  $\mathbf{u}_{j,k}$ , which is  
217 biologically not feasible. In the absence of *P. destructans*, fungal load must be equal  
218 to zero. We considered simulations based on combinations of  $\lambda_k$  and  $\mathbf{u}_{j,k}$  leading to  
219 any  $Pd' < 0$  as failed. Indexes  $k$  for which any element of  $\mathbf{Pd}'_{j,k} < 0$ ,  $\forall \mathbf{u}_{j,k}$  formed a  
220 set of failed simulations  $D$ , which is a subset of all simulations. Fungal load in a  
221 single UV fluorescent lesion was estimated from the sampled distribution as

$$\widetilde{Pd}^1 = P(\widetilde{Pd}_{\forall k \in D}). \quad \text{Eq. 10}$$

222 The simulations were run in R (R Core Team, 2018) with custom scripts,  
223 implementing equations Eq. 1, Eq. 7, Eq. 8, Eq. 9 and Eq. 10. Data visualization used  
224 package *RColorBrewer* (Neuwirth, 2014).  
225 We then used the estimated  $\widetilde{Pd}^1$  to approximate the number of pathogen nuclei in a  
226 skin lesion  $N$ . Given the genome size of *P. destructans*  $G = 30.685 \times 10^6$  bp  
227 (GCA\_000184105.1) and the conversion constant between genome mass and its size  
228  $q = 978 \times 10^6$  (Doležel et al., 2003), the number of *P. destructans* nuclei in a single  
229 WNS skin lesion is

$$N = \frac{\widetilde{Pd}^1 \cdot q}{G}. \quad \text{Eq. 11}$$

230 We applied the results of our simulations to previously published data (Pikula et al.,  
231 2017) to infer the invasive fungal load in the Nearctic and Palearctic bats using  
232 equations Eq. 2 and Eq. 11.

233

## 234 **Results**

235 We ran 1 million simulations of unobserved histopathology during estimation of  
236 fungal load in a WNS lesion. For  $n_\lambda = 1000$ , we permuted designation of samples  
237 with multiple UV fluorescent lesions  $n_u = 1000$  times for each  $\lambda_k$ . When the  
238 theoretical fungal load in a UV lesion  $\lambda_k \in [0.075, 0.097]$  ng, 127 simulations failed  
239 to find any feasible combination of samples with multiple cupping erosions despite  
240 attempting one thousand permutations for each  $\lambda_k$  (Fig. 3), indicating that the range  
241 might represent an upper limit of fungal load in one WNS lesion in *M. myotis*. Results  
242 from 873 successful simulations show that simulating unobserved histopathology  
243 improves the objective function value  $J \in [0.45, 0.80]$  compared to the result from the  
244 original data, where  $J = 0.79$  (Flieger *et al.* 2016). The probability density with  
245 Gaussian kernel of the simulated fungal load in a lesion has the mean equal to 0.0489  
246 ng and standard deviation equal to 0.01134 ng (Fig. 3). This means that one WNS  
247 skin lesion contains  $\widetilde{Pd}^1 = 48.9 \pm 11.34$  pg (mean  $\pm$  SD) of *P. destructans* DNA.  
248 The simulated fungal load then translates to  $1559 \pm 362$  pathogen nuclei in a WNS  
249 lesion.

250 When the data were subset in each simulation to those where  $Pd - \widetilde{Pd} > \lambda_k$ , the  
251 objective function values further decreased to  $J \in [0.28, 0.58]$  and  $\widetilde{Pd}^1 = 34.97 \pm$   
252  $7.42$  pg of *P. destructans* DNA. In both simulation modes, using all data and using  
253 subsets of data, the theoretical  $\lambda$  with the lowest objective function values were about  
254 50.1 to 68.6 pg and the respective estimated  $\widetilde{Pd}^1 \in [11.0, 17.1]$  pg.

255 Using the data on disease severity published by Pikula et al. (2017), the Palearctic  
256 bats had  $n_{UV} = 0.78 \pm 1.44$  WNS lesions per  $\text{cm}^2$  of wing membrane area ( $n =$   
257 173), which translates to  $\bar{P}d = 38.14 \pm 70.42$  pg of *P. destructans* DNA or hyphae  
258 with  $1216 \pm 2244$  nuclei that invaded the unit area of host tissues. In Nearctic bats  
259 with  $n_{UV} = 34.73 \pm 26.35$  UV fluorescent lesions per  $\text{cm}^2$  of wing ( $n = 11$ ), the  
260 invasive fungal growth contains  $\bar{P}d = 1698.30 \pm 1288.52$  pg of *P. destructans*  
261 DNA, meaning fungal hyphae with  $54129 \pm 41068$  nuclei per  $\text{cm}^2$  of wing area.

262

## 263 Discussion

264 The utility in modelling pathogen load from data originating from non-lethal sampling  
265 provides unquestionable advantages and insight into disease dynamics. Non-lethal  
266 sampling promotes more effective sampling that enables to track distribution,  
267 prevalence, spread, infection intensity and disease severity on population level. Our  
268 approach simulated unobserved histological severity in a biopsy sample that was used  
269 to isolate DNA from the bat as well as the total pathogen biomass in the biopsy.  
270 Having established a density distribution of likely fungal loads in one WNS lesion,  
271 the researchers can now use the information to infer total fungal biomass that invaded  
272 the skin of the hibernating bat. We found that one WNS skin lesion contains about 50  
273 pg of *P. destructans* DNA and thus about 1560 genomic copies in the fungal  
274 multinucleic hyphae and spores in the lesion. Translating the value into context of  
275 published data on the number of UV fluorescent spots that are indicative of the WNS  
276 lesions (Pikula et al., 2017), we found that in some Nearctic bats,  $1 \text{ cm}^2$  of their wing  
277 membrane might contain more than 1 ng of pathogen DNA or 54000 pathogen nuclei.  
278 The limitation of the present study lies in the fact that values of the objective function  
279 Eq. 8 did not approach 0 (Fig. 3a). The objective function minimized difference

280 between the slope of regression from adjusted data with simulated histopathologic  
281 findings and the ideal slope equal to 1, when the regression intercept would signify  
282 the fungal load in a single WNS lesion (i.e. Eq. 9). The lack of convergence towards  
283 the optimum may be due to complexity of WNS pathology in the biopsy we did not  
284 consider. The WNS lesions have variable size (Zukal et al., 2016) and some animals  
285 develop full thickness invasion where the fungus replaces host tissues across the  
286 cross-section of the wing membrane (Pikula et al., 2017). Additional noise in the data  
287 is likely introduced with precision of the biopsy punch. Trained personnel stretch a  
288 bat wing on a clean, firm surface transilluminated with UV light and circles the target  
289 area with a punch needle. Although the punch needles have constant diameter, the  
290 sampled wing may differ depending on animal movement, needle slippage or local  
291 stretch of the wing membrane. The apparent solution suggests careful sampling where  
292 the paired biopsies would be taken from wing area equidistant from joints and bones  
293 and the punch site would be chosen with help from magnification to pinpoint single  
294 UV fluorescent spots of similar size. At this moment, such data is not available, and  
295 our simulation provides the best data-driven approximation of the invasive fungal  
296 load during a WNS infection.

297 We addressed the potential problems in sampling by reducing the dataset to only  
298 those observations where the fungal load on a biopsy without a fluorescing WNS  
299 lesion was less than fungal load on the paired biopsy by at least the margin of the  
300 theoretical fungal load in a single WNS lesion. The change resulted in lower objective  
301 function values, but in no simulation was  $J \approx 0$ . The uncertainty in the estimate of the  
302 fungal load in a single WNS lesion remains influenced by the issues mentioned above.  
303 Despite the acknowledged bias, we consider our results useful in infectious disease  
304 research of protected bat species, in which using non-destructive methods is

305 warranted. Photography of a bat wing transilluminated with UV light enables  
306 enumeration of the WNS lesions in the laboratory and together with estimation of  
307 fungal load on the wing surface using a swab sample, these data can be used to  
308 calculate infection invasiveness (Martínková et al. 2018). For practical utility in  
309 evaluating invasive fungal growth in an infected bat (Eq. 2), we recommend using the  
310 fungal load of 49 pg of *P. destructans* DNA in a single WNS lesion. The higher  
311 estimate will better incorporate the unconsidered histopathology and also account for  
312 presence of confluent WNS lesions that cannot be distinguished on the photograph of  
313 the transilluminated bat wing. Using the value of 49 pg of fungal DNA will thus likely  
314 better reflect the biological reality of the infection.

315 Our results provide a valuable tool in assessing invasive infection in endangered  
316 hibernating bats on organismal level. Prior to the current study, the disease severity  
317 was inferred from focal histopathology in a wing biopsy. Now, the researchers can  
318 calculate disease severity as a function of infection invasiveness using non-destructive  
319 UV light transillumination (Turner et al., 2014) in conjunction with our results about  
320 the fungal load in a WNS lesion.

321

### 322 **Acknowledgement**

323 The study was supported by the Czech Science Foundation (Grant No. 17-20286S).  
324 The funding agency had no involvement in study design; in the collection, analysis  
325 and interpretation of data; in the writing of the manuscript; and in the decision to  
326 submit the article for publication. The authors thank Nancy R. Irwin and Jan Zukal for  
327 discussions.

328

329 **Declarations of interest:** none.

330

331 **Contributors:** NM and JP conceptualized the study, NM designed and implemented  
332 the simulation and collated the data, PŠ formalized the mathematical apparatus, NM  
333 and PŠ wrote the manuscript to which all authors contributed.

334

335

## 336 **References**

- 337 Blehert, D. S., Hicks, A. C., Behr, M., Meteyer, C. U., Berlowski-Zier, B. M.,  
338 Buckles, E. L., 2009. Bat white-nose syndrome: An emerging fungal  
339 pathogen? *Science* 323, 227, doi:10.1126/science.1163874.  
340 Cunningham, A. J., 2015. The importance of pathogen load. *PLoS Pathog* 11,  
341 e1004563, doi:10.1371/journal.ppat.1004563.  
342 Doležel, J., Bartoš, J., Voglmayr, H., Greilhuber, J., 2003. Nuclear DNA content and  
343 genome size of trout and human. *Cytometry A* 51, 127-128,  
344 doi:10.1002/cyto.a.10013.  
345 Flieger, M., Bandouchova, H., Cerny, J., Chudíčková, M., Kolarik, M., Kovacova, V.,  
346 Martínková, N., Novák, P., Šebesta, O., Stodůlková, E., Pikula, J., 2016.  
347 Vitamin B2 as a virulence factor in *Pseudogymnoascus destructans* skin  
348 infection. *Scientific Reports* 6, 33200, doi:10.1038/srep33200.  
349 Franz, A., Adams, O., Willems, R., Bonzel, L., Neuhausen, N., Schweizer-Krantz, S.,  
350 Ruggeberg, J. U., Willers, R., Henrich, B., Schroten, H., Tenenbaum, T., 2010.  
351 Correlation of viral load of respiratory pathogens and co-infections with  
352 disease severity in children hospitalized for lower respiratory tract infection. *J*  
353 *Clin Virol* 48, 239-45, doi:10.1016/j.jcv.2010.05.007.  
354 Lorch, J. M., Meteyer, C. U., Behr, M. J., Boyles, J. G., Cryan, P. M., Hicks, A. C.,  
355 2011. Experimental infection of bats with *Geomyces destructans* causes white-  
356 nose syndrome. *Nature* 480, 376-378.  
357 Martínková, N., Pikula, J., Zukal, J., Kovacova, V., Bandouchova, H., Bartonička, T.,  
358 Botvinkin, A. D., Brichta, J., Dundarova, H., Kokurewicz, T., Irwin, N. R.,  
359 Linhart, P., Orlov, O. L., Piacek, V., Škrabánek, P., Tiunov, M. P.,  
360 Zahradníková, A., Jr., 2018. Hibernation temperature-dependent  
361 *Pseudogymnoascus destructans* infection intensity in Palearctic bats.  
362 Virulence, doi:10.1080/21505594.2018.1548685.  
363 Meteyer, C. U., Buckles, E. L., Blehert, D. S., Hicks, A. C., Green, D. E., Shearn-  
364 Bochsler, V., 2009. Histopathologic criteria to confirm white-nose syndrome  
365 in bats. *J. Vet. Diagn. Invest.* 21, 411-414, doi:10.1177/104063870902100401.  
366 Neuwirth, E., 2014. RColorBrewer: ColorBrewer Palettes. R package version 1.1-2.  
367 Pikula, J., Amelon, S. K., Bandouchova, H., Bartonicka, T., Berkova, H., Brichta, J.,  
368 Hooper, S., Kokurewicz, T., Kolarik, M., Kollner, B., Kovacova, V., Linhart,  
369 P., Piacek, V., Turner, G. G., Zukal, J., Martinkova, N., 2017. White-nose  
370 syndrome pathology grading in Nearctic and Palearctic bats. *PLoS One* 12,  
371 e0180435, doi:10.1371/journal.pone.0180435.

- 372 Reeder, D. M., Frank, C. L., Turner, G. G., Meteyer, C. U., Kurta, A., Britzke, E. R.,  
373 Vozzak, M. E., Darling, S. R., Stihler, C. W., Hicks, A. C., Jacob, R.,  
374 Grieneisen, L. E., Brownlee, S. A., Muller, L. K., Blehert, D. S., 2012.  
375 Frequent Arousal from Hibernation Linked to Severity of Infection and  
376 Mortality in Bats with White-Nose Syndrome. PLoS ONE 7, e38920,  
377 doi:10.1371/journal.pone.0038920.g001.
- 378 Team, R. C., 2018. R: A language and environment for statistical computing. R  
379 Foundation for Statistical Computing, Vienna, Austria.
- 380 Turner, G. G., Meteyer, C. U., Barton, H. D., Gumbs, J. F., Reeder, D. M., Overton,  
381 B., Bandouchova, H., Bartonička, T., Martínková, N., Pikula, J., Zupal, J.,  
382 Blehert, D. S., 2014. Nonlethal screening of bat-wing skin with the use of  
383 ultraviolet fluorescence to detect lesions indicative of white-nose syndrome. J.  
384 Wildl. Dis. 50, 566-573, doi:10.7589/2014-03-058.
- 385 van der Poll, T., Opal, S. M., 2008. Host-pathogen interactions in sepsis. Lancet  
386 Infect. Dis. 8, 32-43, doi:10.1016/s14733099(07)70265-7.
- 387 Wilson, D. P., Law, M. G., Grulich, A. E., Cooper, D. A., Kaldor, J. M., 2008.  
388 Relation between HIV viral load and infectiousness: a model-based analysis.  
389 The Lancet 372, 314-320, doi:10.1016/s0140-6736(08)61115-0.
- 390 Zupal, J., Bandouchova, H., Brichta, J., Cmokova, A., Jaron, K. S., Kolarik, M.,  
391 Kovacova, V., Kubátová, A., Nováková, A., Orlov, O., Pikula, J., Presetnik,  
392 P., Šuba, J., Zahradníková, A., Jr., Martínková, N., 2016. White-nose  
393 syndrome without borders: Pseudogymnoascus destructans infection  
394 confirmed in Asia. Scientific Reports 6, 19829, doi:10.1038/srep19829.  
395  
396  
397



398 Figure captions

399 **Fig. 1. Scheme of the relation between the biological and the mathematical model**

400 **in estimating fungal load in a skin lesion.** Bat wing membrane (pink) was biopsied

401 at two places, once at a wing segment without orange-yellow fluorescence under UV

402 light, and once at a wing segment with a single fluorescing dot. Each biopsy was

403 enzymatically digested and total fungal DNA was quantified with a quantitative

404 polymerase chain reaction. The quantity of fungal DNA, the fungal load, in a biopsy

405 without UV fluorescence represents the fungus that grows on the wing surface (purple

406 lines,  $\widetilde{Pd}$ ). The fungal load in a biopsy with a UV fluorescent dot represents the

407 fungus growing on the wing surface, as well as the fungus that invaded the bat wing

408 and formed cupping erosions diagnostic of white-nose syndrome (purple lines and

409 ovals,  $Pd$ ). In the field, a single cupping erosion cannot be distinguished from a series

410 of confluent cupping erosions. The unobserved histopathology must thus be simulated

411 to estimate the fungal load in a single cupping erosion ( $\widetilde{Pd}^1$ ).

412

413 **Fig. 2. Illustrative modification of fungal load in a bat wing membrane biopsy**

414 **with UV fluorescence to include simulation of the histopathologic findings.** Open

415 circles – measured quantification of *Pseudogymnoascus destructans* DNA in paired

416 biopsies from one bat with the respective regression between fungal load in a wing

417 biopsy without UV fluorescence (and thus without a WNS lesion) and fungal load in a

418 biopsy with UV fluorescence given as a dashed line. Closed circles – adjusted fungal

419 loads, mimicking putative presence of multiple WNS lesions in one biopsy (Eq. 7).

420 The regression line is solid for the adjusted fungal loads. Arrows – direction of

421 change from measured to simulated fungal load per one WNS lesion in the biopsy.

422 Where no arrows are present, the closed circles overlap the measured data in the open

423 circles, meaning that the simulation did not assign more than one WNS lesion in the  
424 given biopsy.  $\lambda$  – Theoretical fungal load in one WNS lesion as used in the simulation  
425 (ng).

426

427 **Fig. 3. Load of *Pseudogymnoascus destructans* DNA in one UV fluorescent lesion**

428 **diagnostic for white-nose syndrome in a *Myotis myotis* bat. (A)** Successful

429 simulations of permuted number of additional WNS skin lesions in a wing biopsy.

430 Theoretical starting values of fungal load in a single WNS lesion are indicated by the

431 colour scheme. **(B)** Density with the Gaussian kernel of the sampled distribution of

432 fungal load in a single WNS lesion in successful (orange) and failed (black)

433 simulations. Simulations were considered failed if all random assignments of

434 additional WNS lesion in a biopsy resulted in at least one adjusted fungal load below

435 zero.

436

No fluorescence

UV fluorescence

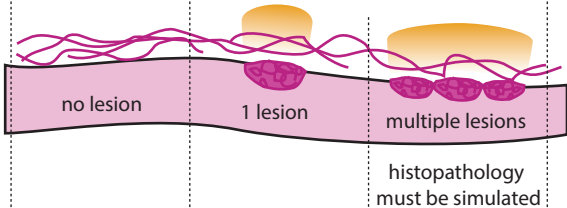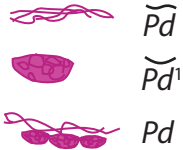

$$Pd = \tilde{Pd}$$

$$Pd = \tilde{Pd} + \tilde{Pd}^1$$

$$Pd = \tilde{Pd} + \tilde{Pd}^1 + u \cdot \tilde{Pd}^1$$

where  $u = 2$

*P. destructans* load in biopsy with WNS lesions ( $\log_{10}(\text{ng})$ )

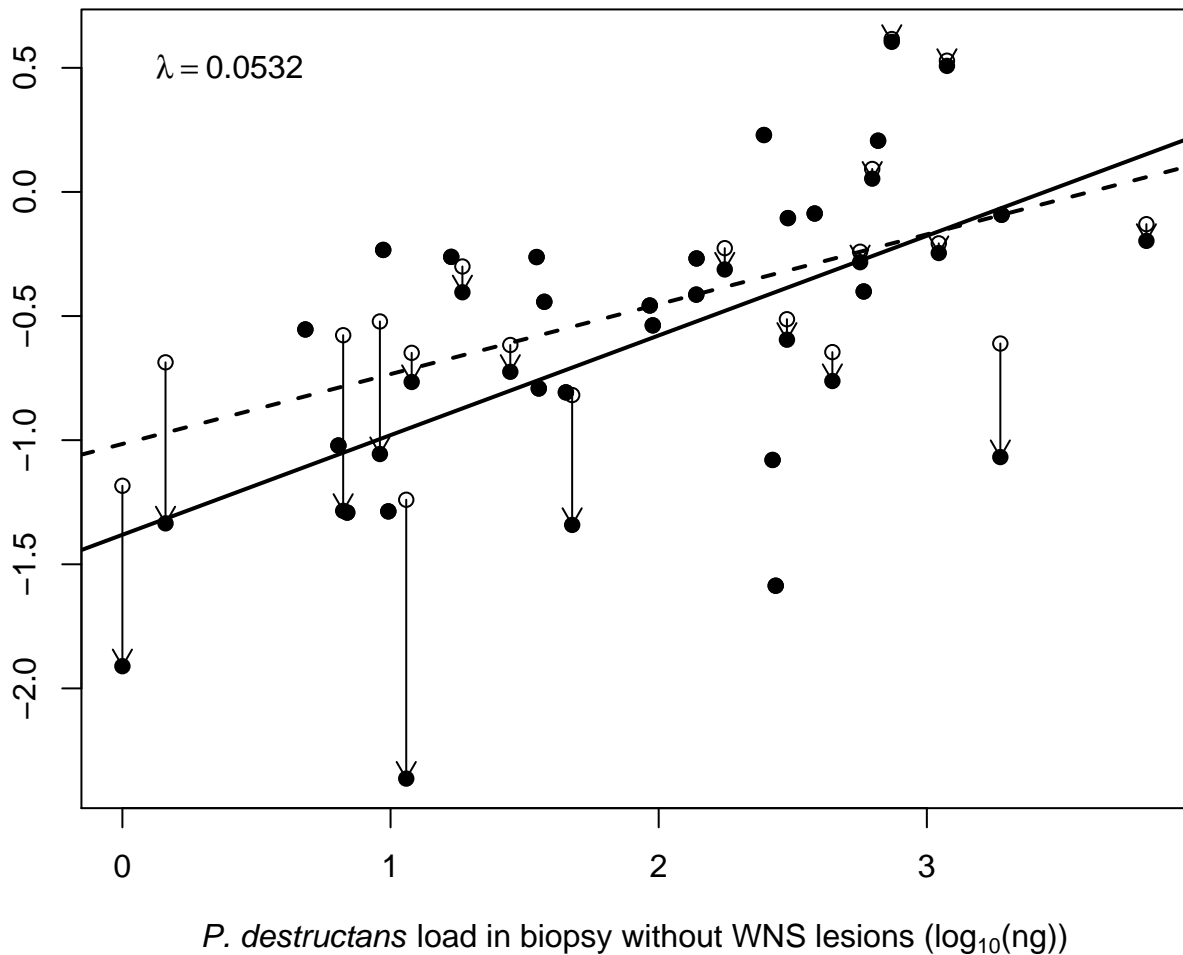

a)

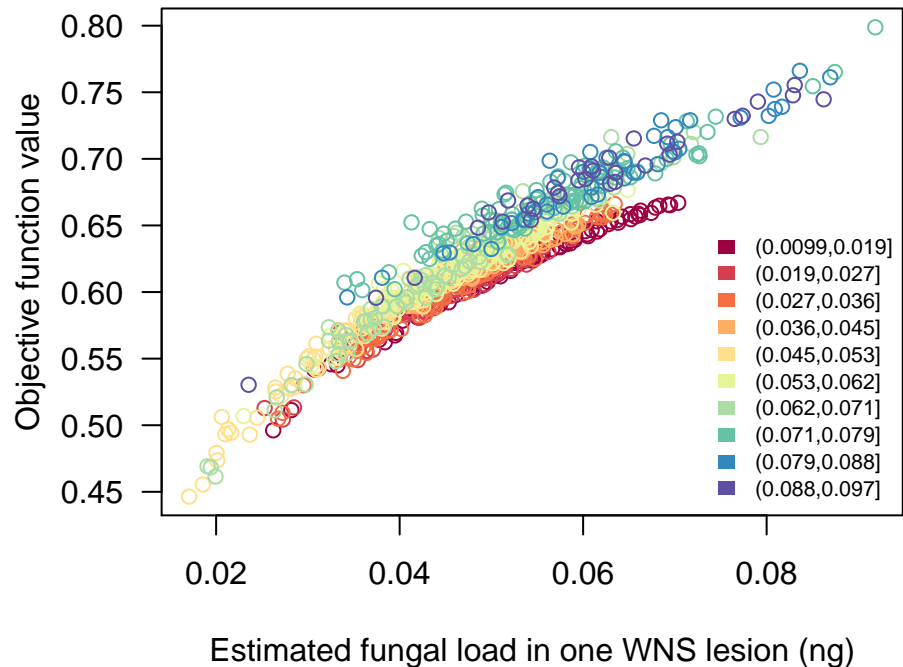

b)

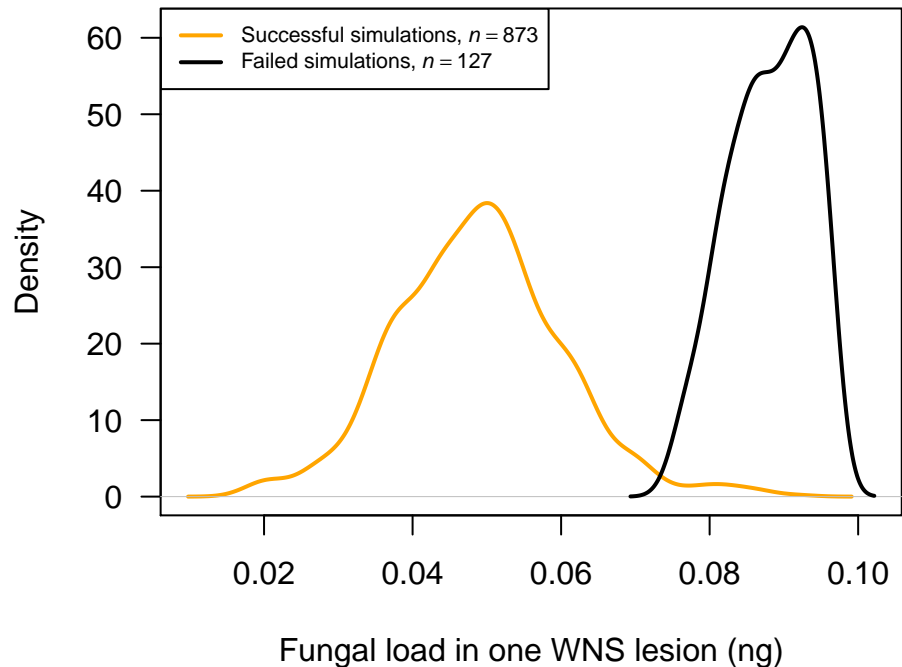

Source: https://www.biorxiv.org/content/10.1101/474817v1.full.pdf
